# Supplementary material for: Functional and Pharmacological Analysis of Cardiomyocytes Differentiated from Human Peripheral Blood Mononuclear-Derived Pluripotent Stem Cells
Source: PubMed Central journal article supplement — Stem Cell Reports. 2014 May 29;3(1):131–41. doi: 10.1016/j.stemcr.2014.04.017 (PMC4110777; doi:10.1016/j.stemcr.2014.04.017), 2014-05-29
Supplement: mmc1.pdf [file mmc1.pdf]

**Stem Cell Reports, Volume 3**

**Supplemental Information**

**Functional and Pharmacological Analysis of  
Cardiomyocytes Differentiated from Human Peripheral  
Blood Mononuclear-Derived Pluripotent Stem Cells**

**Michael Riedel, Chuanchau J. Jou, Shuping Lai, Robert L. Lux, Alonso P. Moreno,  
Kenneth W. Spitzer, Elizabeth Christians, Martin Tristani-Firouzi, and Ivor J. Benjamin**

# Supplemental Data

## Supplemental Figures

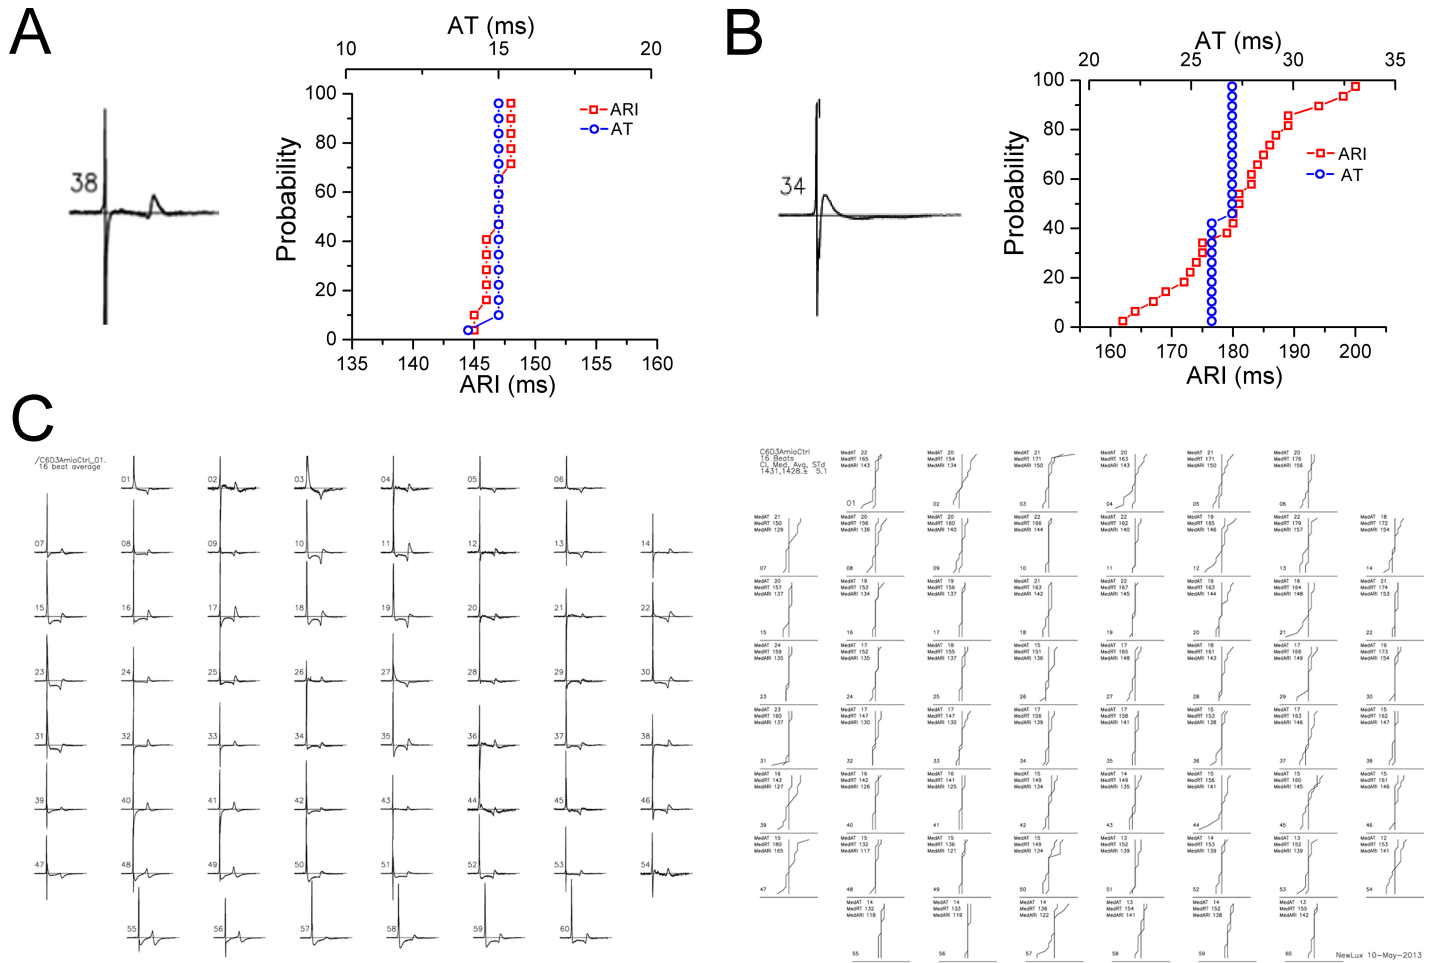

**Figure S1. Methodology to assess the quality of MEA recordings, related to Figure 5.**

Plots of the cumulative probability distribution functions (CPDFs) of activation times (AT) and activation-recovery intervals (ARI) for an electrogram displaying a well-defined T upstroke (A) and an electrogram with low amplitude repolarization waveform (B). Each plot shows all N measurements for each variable. The plots provide a means to reject outliers and thereby calculate average values while excluding 20% of the measurements at the extremes. C, Left panel shows the 60 individual MEA electrograms for a recording having excellent repolarization waveforms. The right panel shows all the CPDFs for ATs and ARIs from each electrogram. These measures were used to quality control the analyzed data and thereby improve precision.

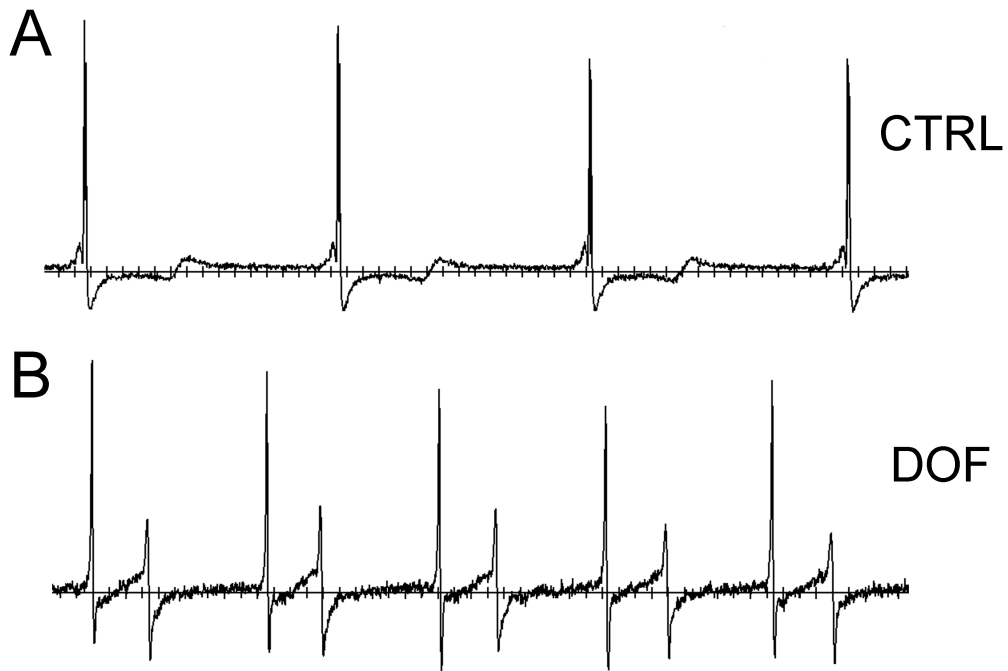

**Figure S2. Early after-depolarizations induced by dofetilide, related to Figure 6.** A, Baseline recording of local electrogram from the 60 MEA chamber in control solution. B, Same electrogram after perfusion with 10 nM dofetilide showing spontaneous depolarizations that emanate from repolarization time period. Each horizontal tick represents 50 ms. CTRL, control; DOF, dofetilide.

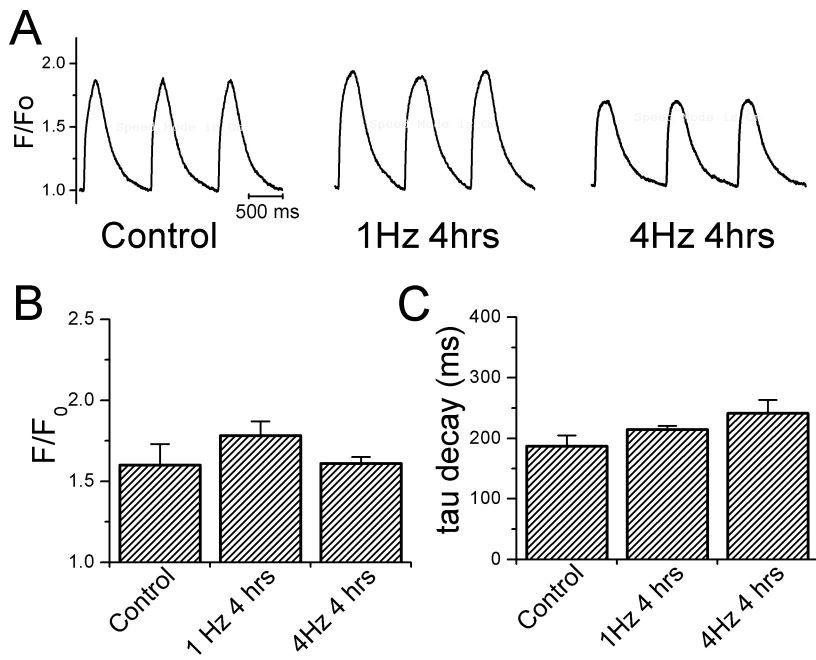

**Figure S3. Rapid electrical stimulation for short periods of time (4 hrs) does not reduce Ca<sup>2+</sup> transients,**

**Related to Figure 7.**

**A**, Representative Ca<sup>2+</sup> transients recorded using fluo-4 labeled human iPSC-CM unpaced (control) and paced at 1Hz or 4 Hz for 4 hours. **B**, Bar graphs showing magnitude of Ca<sup>2+</sup> transient expressed as F/F<sub>0</sub> and rate of transient decay (tau, ms). N=10 independent recordings, each group. Unlike rapid electrical stimulation for 8 hours, stimulation at 4 Hz for 4 hours did not alter the magnitude or rate of Ca<sup>2+</sup> decay.

## Supplemental Tables

**Table S1.** RT-qPCR primers for pluripotency gene characterizations

|                                                                      |                       |
|----------------------------------------------------------------------|-----------------------|
| Hs_RRN18S_1_SG QuantiTect Primer Assay (200) Cat. No./ID: QT00199367 | human <i>18S rRNA</i> |
| Hs_SOX2_1_SG QuantiTect Primer Assay (200) Cat. No./ID: QT00237601   | human <i>SOX2</i>     |
| Hs_NANOG_2_SG QuantiTect Primer Assay (200) Cat. No./ID: QT01844808  | human <i>NANOG</i>    |
| Hs_PODXL_1_SG QuantiTect Primer Assay (200) Cat. No./ID: QT00005138  | human <i>TRA-1-60</i> |
| Hs_POU5F1_1_SG QuantiTect Primer Assay (200) Cat. No./ID: QT00210840 | human <i>OCT4</i>     |

**Table S2 . RT-qPCR primers for in vitro 3 germ layer characterizations**

|                                                                      |                                    |
|----------------------------------------------------------------------|------------------------------------|
| Hs_RRN18S_1_SG QuantiTect Primer Assay (200) Cat. No./ID: QT00199367 | human <i>18S rRNA</i>              |
| Hs_AFP1_1_SG QuantiTect Primer Assay (200) Cat. No./ID: QT00085183   | human <i>AFP1</i>                  |
| Hs_GATA4_1_SG QuantiTect Primer Assay (200) Cat. No./ID: QT00031997  | human <i>GATA4</i>                 |
| Hs_MYH6_1_SG QuantiTect Primer Assay (200) Cat. No./ID: QT00030807   | human cardiac <i>MYH6</i>          |
| Hs_T_1_SG QuantiTect Primer Assay (200) Cat. No./ID: QT00062314      | human <i>BRACHYURY</i>             |
| Hs_TUBB3_1_SG QuantiTect Primer Assay (200) Cat. No./ID: QT0083713   | human $\beta$ -III- <i>TUBULIN</i> |
| Hs_VIM_1_SG QuantiTect Primer Assay (200) Cat. No./ID: QT00095795    | human <i>VIMENTIN</i>              |

**Table S3.** Antibodies used in this study.

|                              |               |
|------------------------------|---------------|
| NANOG                        | abcam ab80892 |
| SSEA4                        | abcam ab16287 |
| OCT4                         | abcam ab27985 |
| TRA-1-81                     | abcam ab16289 |
| cardiac TROPONIN T           | abcam ab45932 |
| sarcomeric $\alpha$ -ACTININ | Sigma A7732   |

## **Supplemental Methods**

### **Measurement of intracellular calcium**

Calcium transients (CaTs) were detected in human iPSC-CMs with an epifluorescence system using the fluorescent indicator fluo-4 AM (Molecular Probes). Cells were bathed in a buffered physiological solution containing 7.5 mM fluo-4 AM for 3 minutes, then transferred to a recording chamber coated with poly-L-Lysine and continuously perfused with a physiological solution 37°C. CaTs were recorded from spontaneously beating cell clusters or clusters paced at various cycle lengths using an external field stimulator. Fluorescence emission ( $535 \pm 11$  nm, band-pass filter) was collected with a photomultiplier tube via the  $\times 40$  oil objective (numerical aperture 1.3) during continuous excitation at 485 nm with a 150-W Xenon lamp. Fluorescence signals were background corrected and expressed as  $F/F_0$  (the ratio of fluorescence during the CaT divided by diastolic fluorescence). The time course of CaT decay (tau decay) was measured by fitting the decay phase to a monoexponential function. All measurements were performed in triplicate.
